# Supplementary material for: Elucidation of reaction network and kinetics between cellulose-derived 1,2-propanediol and methanol for one-pot biofuel production
Source: Royal Society of Chemistry journal article supplement (doi:10.1039/d1gc03650e), 2021-12-09
Supplement: d1gc03650e1.pdf [file d1gc03650e1.pdf]

## **Elucidation of Reaction Network and Kinetics between Cellulose-Derived 1,2-Propanediol and Methanol for One-Pot Biofuel Production**

### **Authors:**

Raka G. Dastidar,<sup>†</sup> Peter H. Galebach,<sup>†</sup> Michael P. Lanci,<sup>‡</sup> Chengrong Wang,<sup>‡</sup> Yi Du,<sup>‡</sup> and George W. Huber<sup>†,\*</sup>

### **Affiliations:**

<sup>†</sup>Department of Chemical and Biological Engineering, University of Wisconsin, 1415 Engineering Drive, Madison, Wisconsin 53706, United States

<sup>‡</sup>ExxonMobil Research and Engineering, 1545 Route 22 East, Annandale, New Jersey 08801, United States

\*Corresponding author: George W. Huber

Tel: +1 413 695 8032, E-mail: [gwhuber@wisc.edu](mailto:gwhuber@wisc.edu)

### **SUPPLEMENTARY INFORMATION**

Number of pages: 7

Number of figures: 3

Number of tables: 4

**Table S1.** Catalyst characterization information for 20 wt% CuMgAlO<sub>x</sub> from ICP-AES<sup>a</sup>, N<sub>2</sub> physisorption<sup>b</sup>, NH<sub>3</sub> TPD<sup>c</sup>, CO<sub>2</sub> TPD<sup>d</sup>, and N<sub>2</sub>O pulse chemisorption<sup>e</sup>. Synthesis and characterization details are described in previous work.<sup>1,2</sup>

| Property                                                        | Value      |
|-----------------------------------------------------------------|------------|
| <sup>a</sup> Cu/Mg/Al ratio (mol basis)                         | 3.5/12/5.1 |
| <sup>b</sup> BET surface area (m <sup>2</sup> g <sup>-1</sup> ) | 173.7      |
| <sup>c</sup> Acid site density (mmol g <sup>-1</sup> )          | 0.14       |
| <sup>d</sup> Base site density (mmol g <sup>-1</sup> )          | 6.2        |
| <sup>e</sup> Cu <sup>0</sup> density (mmol g <sup>-1</sup> )    | 0.40       |
| <sup>a,e</sup> Cu <sup>0</sup> Dispersion (%)                   | 16.2       |

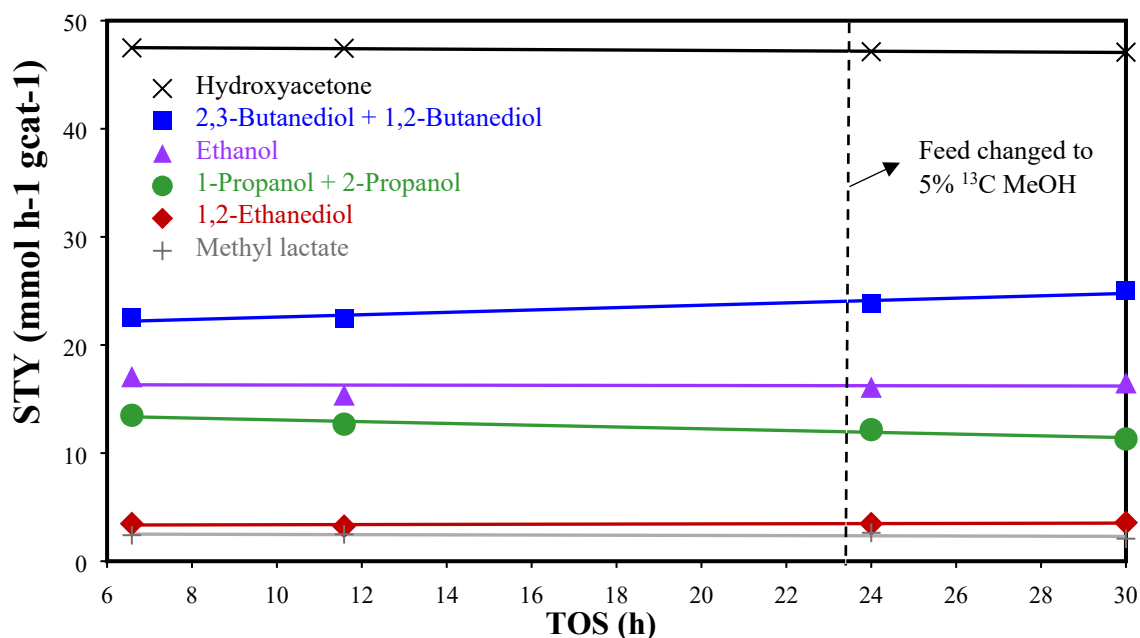

**Figure S1.** Product STY as a function of TOS for catalytic conversion of 1,2-PDO and MeOH during isotopic <sup>13</sup>C MeOH study from GC-FID. Reaction conditions: 300 °C, 1000 psig, 40 h<sup>-1</sup> WHSV, 24 mg CuMgAlO<sub>x</sub>, 0.1 mL/min feed with 10 mol% 1,2-PDO in MeOH, 102.5 mL/min H<sub>2</sub>, 30 h. After 24 h, 5% of MeOH was replaced with <sup>13</sup>C MeOH.

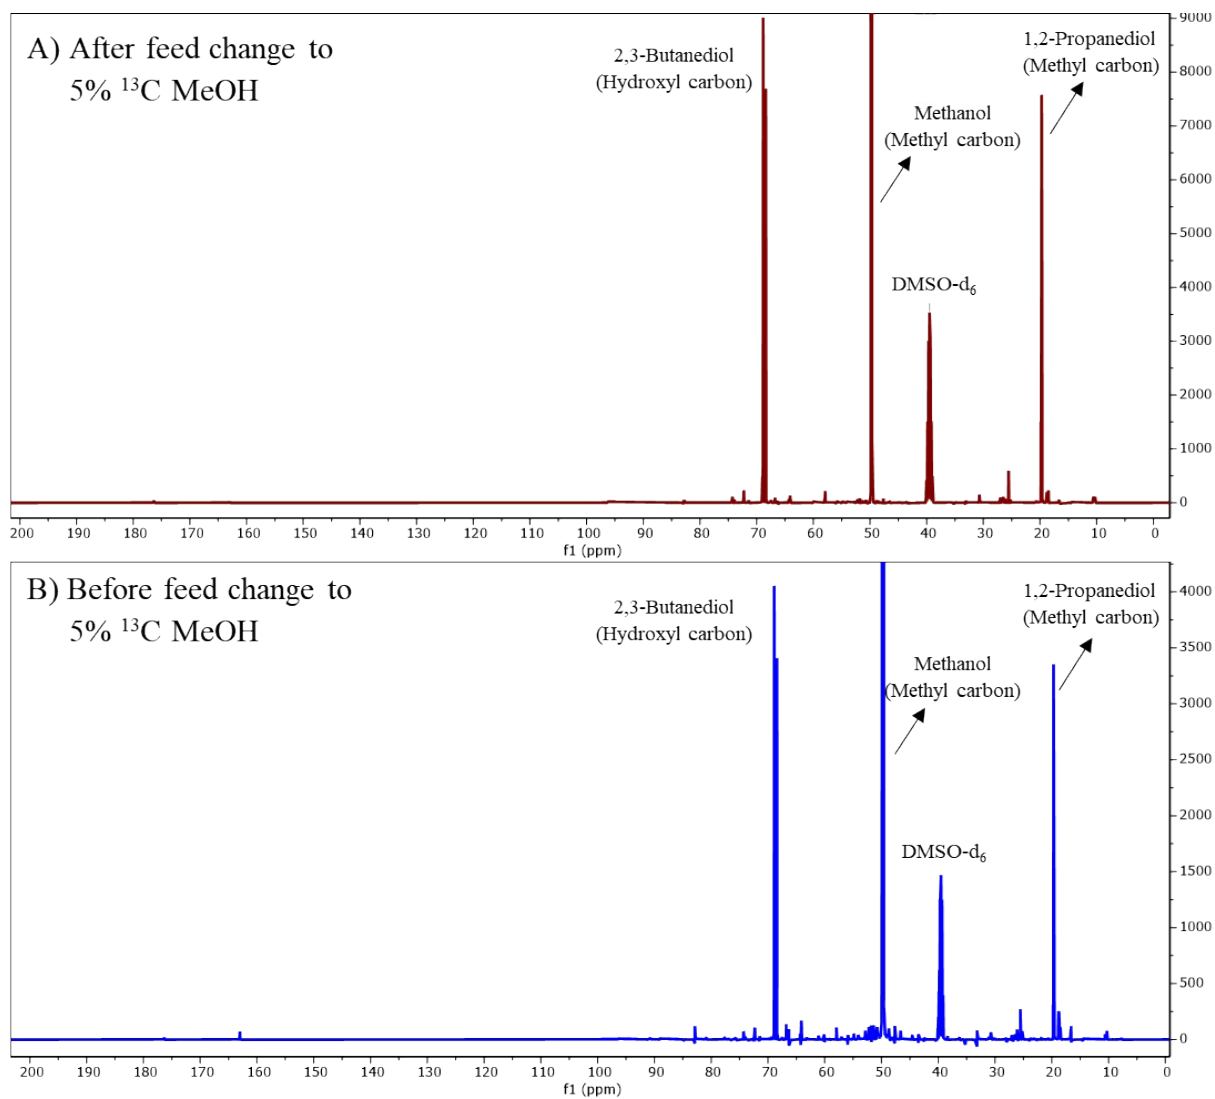

**Figure S2.** Quantitative  $^{13}\text{C}$  NMR spectra for sample: A) after 5% of feed MeOH was replaced with  $^{13}\text{C}$  MeOH; and B) before feed switch (natural abundance of  $^{13}\text{C}$ ). Reaction conditions: 300  $^{\circ}\text{C}$ , 1000 psig, 40  $\text{h}^{-1}$  WHSV, 24 mg  $\text{CuMgAlO}_x$ , 0.1 mL/min feed with 10 mol% 1,2-PDO in MeOH, 102.5 mL/min  $\text{H}_2$ , 30 h, feed switched to 5%  $^{13}\text{C}$  MeOH after 24 h.

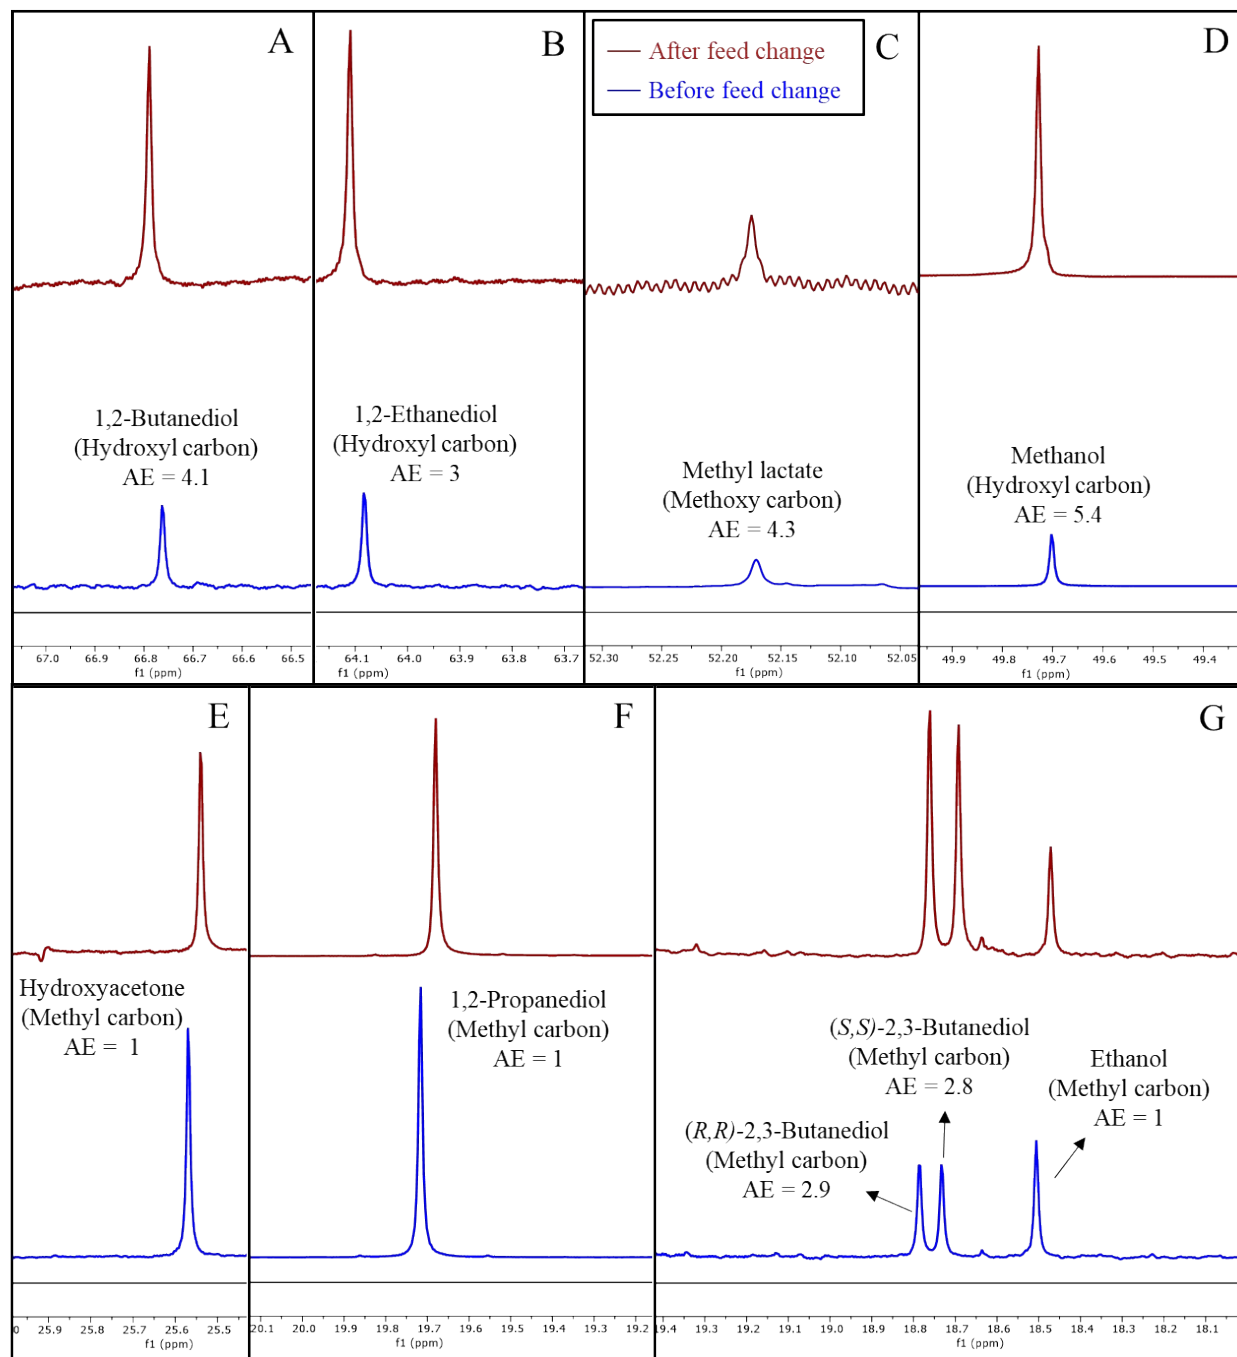

**Figure S3.** Quantitative  $^{13}\text{C}$  NMR spectrum from isotopic  $^{13}\text{C}$  MeOH study with Area Enhancement (AE) for: A) 1,2-Butanediol; B) 1,2-Ethanediol; C) Methyl lactate; D) Methanol; E) Hydroxyacetone; F) 1,2-Propanediol; G) 2,3-Butanediol and Ethanol. Reaction conditions: 300  $^{\circ}\text{C}$ , 1000 psig, 40  $\text{h}^{-1}$  WHSV, 24 mg  $\text{CuMgAlO}_x$ , 0.1 mL/min feed with 10 mol% 1,2-PDO in MeOH, 102.5 mL/min  $\text{H}_2$ , 30 h, feed switched to 5%  $^{13}\text{C}$  MeOH after 24 h.

**Table S2.** Enthalpy, Gibbs free energy, and entropy of dehydrogenation, esterification, C-C coupling, C-O scission, direct C-C scission, and retro aldol condensation reactions at 300 °C and 1000 psig from Aspen Plus.

| Reactions                                                                    | $\Delta H$ (kJ/mol) | $\Delta G$ (kJ/mol) | $\Delta S$ (J/mol K) |
|------------------------------------------------------------------------------|---------------------|---------------------|----------------------|
| <b>Dehydrogenation</b>                                                       |                     |                     |                      |
| 1,2-Propanediol $\rightarrow$ Hydroxyacetone + H <sub>2</sub>                | -1.1                | -23.3               | -14.2                |
| <b>Esterification</b>                                                        |                     |                     |                      |
| 1,2-Propanediol + Methanol $\rightarrow$ Methyl lactate + 2H <sub>2</sub>    | -15.2               | -32.2               | -56.1                |
| Hydroxyacetone + Methanol $\rightarrow$ Methyl lactate + H <sub>2</sub>      | -14.1               | -8.9                | -41.8                |
| <b>C-C coupling</b>                                                          |                     |                     |                      |
| 1,2-Propanediol + Methanol $\rightarrow$ 2,3-Butanediol + H <sub>2</sub> O   | -11.8               | -148.4              | 62.0                 |
| 1,2-Propanediol + Methanol $\rightarrow$ 1,2-Butanediol + H <sub>2</sub> O   | -17.0               | -99.6               | 12.1                 |
| <b>C-O scission</b>                                                          |                     |                     |                      |
| 1,2-Propanediol + H <sub>2</sub> $\rightarrow$ 1-Propanol + H <sub>2</sub> O | -1.7                | -119.4              | 66.7                 |
| 1,2-Propanediol + H <sub>2</sub> $\rightarrow$ 2-Propanol + H <sub>2</sub> O | -5.7                | -132.8              | 65.2                 |
| <b>Direct C-C scission</b>                                                   |                     |                     |                      |
| 1,2-Propanediol + H <sub>2</sub> $\rightarrow$ Ethanol + Methanol            | 15.4                | -61.9               | 72.2                 |
| <b>Retro aldol condensation</b>                                              |                     |                     |                      |
| 1,2-Propanediol + Methanol $\rightarrow$ Ethanol + 1,2-Ethanediol            | 13.3                | -56.1               | 68.8                 |

**Table S3.** Major products (with corresponding STYs in parentheses) from reaction of MeOH with vicinal diols (1,2-butanediol and 2,3-butanediol) and terminal diols (1,3-propanediol and 1,4-butanediol) using GC-FID. Reaction conditions: 300 °C, 1000 psig, CuMgAlO<sub>x</sub>, 120 h<sup>-1</sup> WHSV, 0.1 mL/min feed with 10 mol% diol in MeOH, 102.5 mL/min H<sub>2</sub>, 24 h. For reaction of 1,2-PDO with MeOH, see **Table S4**.

| Feed diol                     | 1,2-Butanediol                                | 2,3-Butanediol            | 1,3-Propanediol                  | 1,4-Butanediol    |
|-------------------------------|-----------------------------------------------|---------------------------|----------------------------------|-------------------|
| Dehydrogenation               | 1-Hydroxy-2-butanone (100)                    | 3-Hydroxy-2-butanone (41) | 0                                | 2-Hydroxy-THF (4) |
| C-C coupling with MeOH        | 2,3-Pentanediol (23);<br>1,2-Pentanediol (13) | 2,3-Pentanediol (2.6)     | 0                                | 0                 |
| Retro aldol condensation      | 1,2-Ethanediol (6)                            | 1,3-Propanediol (3.6)     | 0                                | 0                 |
| C-O scission                  | 2-Butanol (12);<br>1-Butanol (10)             | 2-Butanol (3)             | 1-Propanol (48);<br>Propanal (8) | 1-Butanol (32)    |
| Direct C-C scission           | 1-Propanol (18)                               | Ethanol (3.7)             | Ethanol (16)                     | Ethanol (5)       |
| Others                        | Methyl butanoate (2)                          | N/A                       | 1,3-Dioxane (24)                 | THF (7.5)         |
| <b>Conversion of diol (%)</b> | 7.5                                           | 3.5                       | 5.8                              | 2.8               |

**Table S4.** Major products (with corresponding STYs in parentheses) from reaction of 1,2-PDO with primary monoalcohols (MeOH, ethanol and 1-propanol) and secondary monoalcohols (2-propanol) using GC-FID. Reaction conditions: 300 °C, 1000 psig, CuMgAlO<sub>x</sub>, 120 h<sup>-1</sup> WHSV, 0.1 mL/min feed with 10 mol% 1,2-PDO in monoalcohol, 102.5 mL/min H<sub>2</sub>, 24 h.

| Feed monoalcohol                 | Methanol                                    | Ethanol                                       | 1-Propanol                     | 2-Propanol                     |
|----------------------------------|---------------------------------------------|-----------------------------------------------|--------------------------------|--------------------------------|
| Hydroxyacetone                   | 131                                         | 37                                            | 80                             | 70                             |
| C-C coupling with 1,2-PDO        | 2,3-Butanediol (40);<br>1,2-Butanediol (18) | 2,3-Pentanediol (1.4);<br>1,2-Pentanediol (1) | 1,2-Hexanediol (4)             | 0                              |
| Retro aldol condensation         | 1,2-Ethanediol (8)                          | 0                                             | 0                              | 0                              |
| C-O scission                     | 1-Propanol (11.6);<br>2-Propanol (12.3)     | 1-Propanol (2.4);<br>2-Propanol (1.9)         | <i>Feed</i><br>2-Propanol (9)  | 1-Propanol (11)<br><i>Feed</i> |
| Direct C-C scission              | <i>Feed</i><br>Ethanol (40)                 | Methanol (13)<br><i>Feed</i>                  | Methanol (24);<br>Ethanol (25) | Methanol (22);<br>Ethanol (20) |
| Others                           | Methyl lactate (8)                          | Ethyl acetate (0.7)                           | Propyl propanoate (12)         | Isopropyl lactate (0.6)        |
| <b>Conversion of 1,2-PDO (%)</b> | 11.8                                        | 4.3                                           | 7.5                            | 0.05                           |

## References:

1. Galebach, P. H.; McClelland, D. J.; Eagan, N. M.; Wittrig, A. M.; Buchanan, J. S.; Dumesic, J. A.; Huber, G. W., Production of Alcohols from Cellulose by Supercritical Methanol Depolymerization and Hydrodeoxygenation. *ACS Sustainable Chemistry & Engineering* **2018**, *6* (3), 4330-4344.
2. Galebach, P. H.; Thompson, S.; Wittrig, A. M.; Buchanan, J. S.; Huber, G. W., Investigation of the Reaction Pathways of Biomass-Derived Oxygenate Conversion into Monoalcohols in Supercritical Methanol with CuMgAl-Mixed-Metal Oxide. *ChemSusChem* **2018**, *11* (23), 4007-4017.
